# Supplementary material for: Electronic health records as a window into telehealth: exploring service utilisation and mental health outcomes in Pakistan
Source: PubMed Central journal article supplement — Gen Psychiatr. 2024 Sep 5;37(5):e101609. doi: 10.1136/gpsych-2024-101609 (PMC11381653; doi:10.1136/gpsych-2024-101609), 2024-09-05

Identification

Medical records of patients seeking mental health care were identified through a database of Sehat Kahani E-clinics in Pakistan from Mar 1 - Oct 31, 2023 (n=5200)

Screening

Records screened (n=5200)

Records excluded (n=344)  
- Incomplete information (n=105)  
- Minors (underage) (n=239)

Included

Medical records of patients seeking mental health treatment that were included in the final analysis (n=4856)

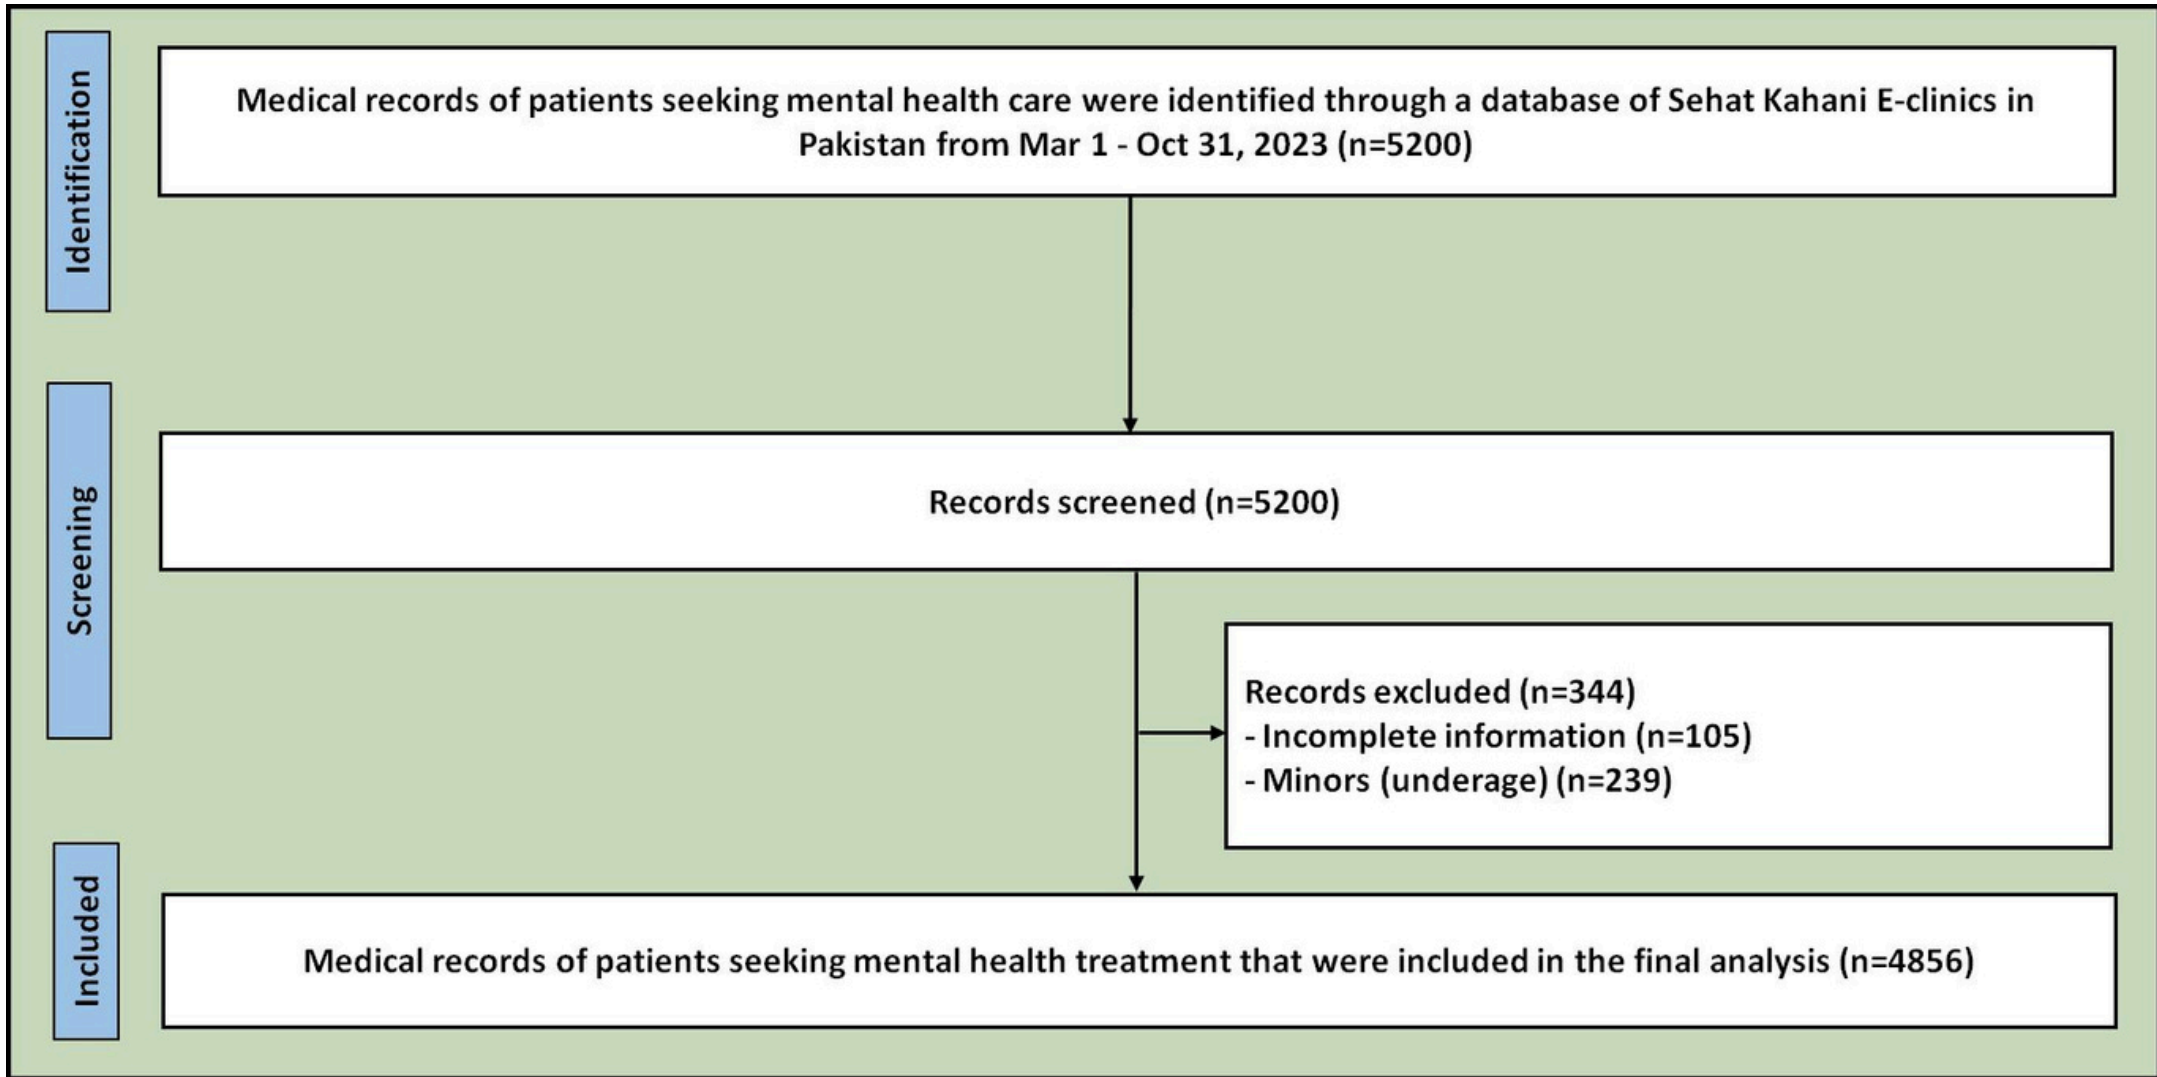

Supplement: gpsych-37-5-s001.pdf [file gpsych-37-5-s001.pdf]
