# Supplementary material for: Electronic health records as a window into telehealth: exploring service utilisation and mental health outcomes in Pakistan
Source: PubMed Central journal article supplement — Gen Psychiatr. 2024 Sep 5;37(5):e101609. doi: 10.1136/gpsych-2024-101609 (PMC11381653; doi:10.1136/gpsych-2024-101609), 2024-09-05
Supplement: gpsych-37-5-s002.pdf [file gpsych-37-5-s002.pdf]

| Supplementary Table No-1: Association between age categories and other variables |                 |                                                    |      |             |      |         |                                                |      |      |      |         |                                    |      |      |      |          |      |                   |      |        |      |         |
|----------------------------------------------------------------------------------|-----------------|----------------------------------------------------|------|-------------|------|---------|------------------------------------------------|------|------|------|---------|------------------------------------|------|------|------|----------|------|-------------------|------|--------|------|---------|
|                                                                                  |                 | Type of the registration of patient visiting Sehat |      |             |      | P-value | The patient is referred to Sehat Kahani Mental |      |      |      | P-value | PHQ-9 categories based on severity |      |      |      |          |      |                   |      |        |      | P-value |
|                                                                                  |                 | Follow-up patient                                  |      | New patient |      |         | Yes                                            |      | No   |      |         | None                               |      | Mild |      | Moderate |      | Moderately Severe |      | Severe |      |         |
|                                                                                  |                 | n                                                  | %    | n           | %    |         | n                                              | %    | n    | %    |         | n                                  | %    | n    | %    | n        | %    | n                 | %    | n      | %    |         |
| Age categories of the patient                                                    | Age Group 18-28 | 556                                                | 67.3 | 270         | 32.7 | 0.020   | 229                                            | 27.7 | 597  | 72.3 | 0.020   | 220                                | 26.6 | 170  | 20.6 | 125      | 15.1 | 199               | 24.1 | 112    | 13.6 | 0.011   |
|                                                                                  | Age Group 29-39 | 1832                                               | 70.2 | 779         | 29.8 |         | 660                                            | 25.3 | 1951 | 74.7 |         | 661                                | 25.3 | 483  | 18.5 | 420      | 16.1 | 618               | 23.7 | 429    | 16.4 |         |
|                                                                                  | Age Group 40-50 | 686                                                | 65.4 | 363         | 34.6 |         | 300                                            | 28.6 | 749  | 71.4 |         | 304                                | 29   | 218  | 20.8 | 160      | 15.3 | 210               | 20   | 157    | 15   |         |
|                                                                                  | Age Group 51-61 | 203                                                | 72   | 79          | 28   |         | 79                                             | 28   | 203  | 72   |         | 83                                 | 29.4 | 39   | 13.8 | 57       | 20.2 | 50                | 17.7 | 53     | 18.8 |         |
|                                                                                  | Age Group 62+   | 55                                                 | 62.5 | 33          | 37.5 |         | 34                                             | 38.6 | 54   | 61.4 |         | 26                                 | 29.5 | 14   | 15.9 | 10       | 11.4 | 22                | 25   | 16     | 18.2 |         |
